# Supplementary material for: A pH-neutral bioactive glass coated 3D-printed porous Ti6Al4V scaffold with enhanced osseointegration
Source: Royal Society of Chemistry journal article supplement (doi:10.1039/d2tb02129c), 2022-11-29
Supplement: d2tb02129c1.pdf [file d2tb02129c1.pdf]

### Supplementary Material

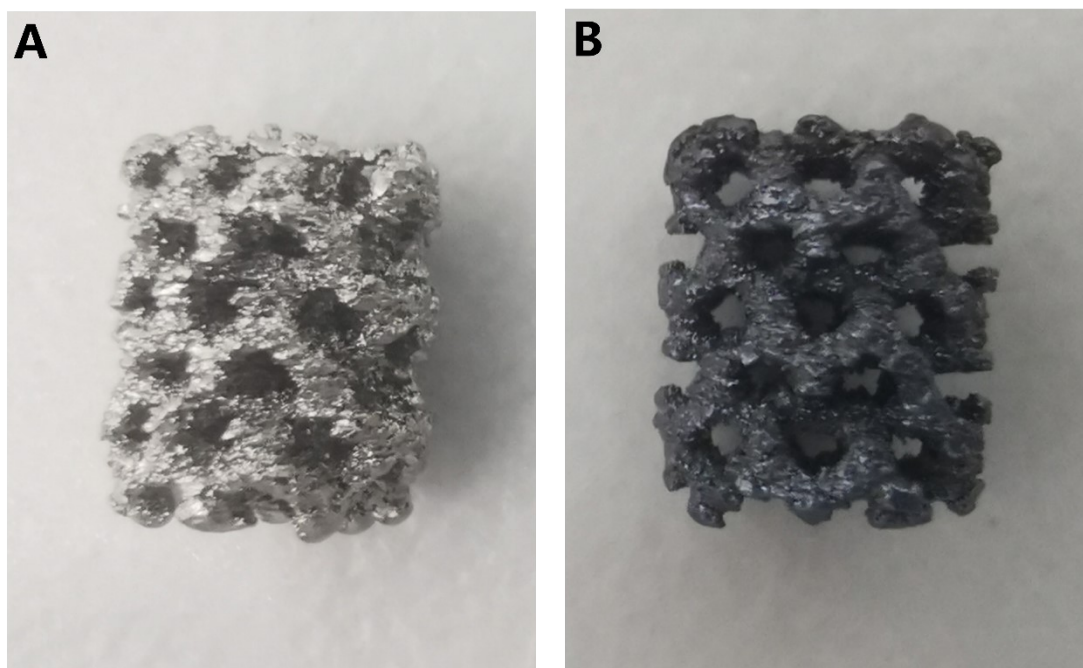

**Supplementary Figure 1. Image of 3D-printed Ti6Al4V porous scaffold and PSC-coated 3D-printed Ti6Al4V porous scaffold**

(A) 3D-printed Ti6Al4V scaffold without PSC coating. (B) PSC-coated 3D-printed Ti6Al4V porous scaffold.

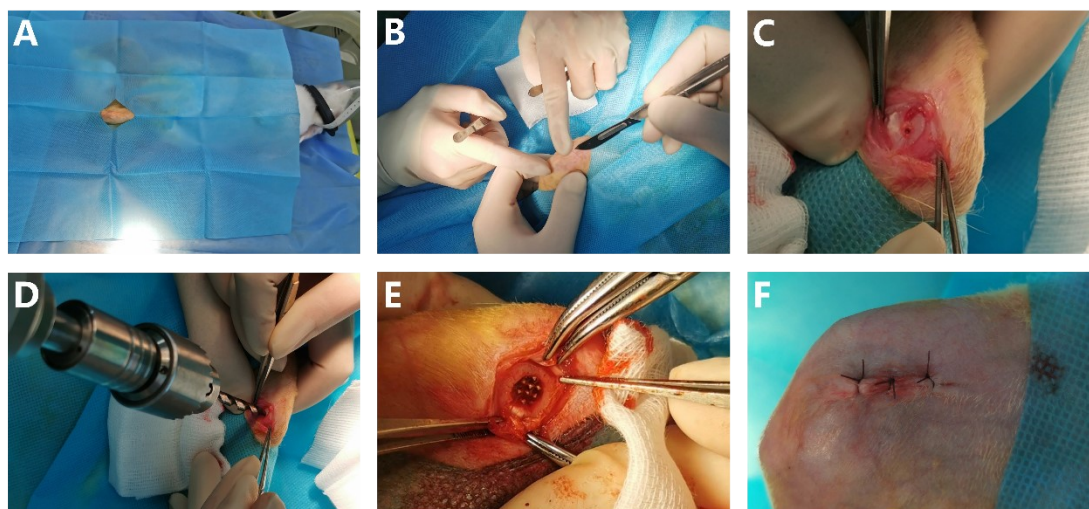

**Supplementary Figure 2. Process of Animal Surgery**

(A) General anesthesia and disinfection. (B) Incision of skin and subcutaneous tissue. (C) Exposition of medial femoral condyles. (D) Drill a hole with a diameter of 5mm and a depth of 6mm. (E) Implant scaffolds. (F) Wound closing.

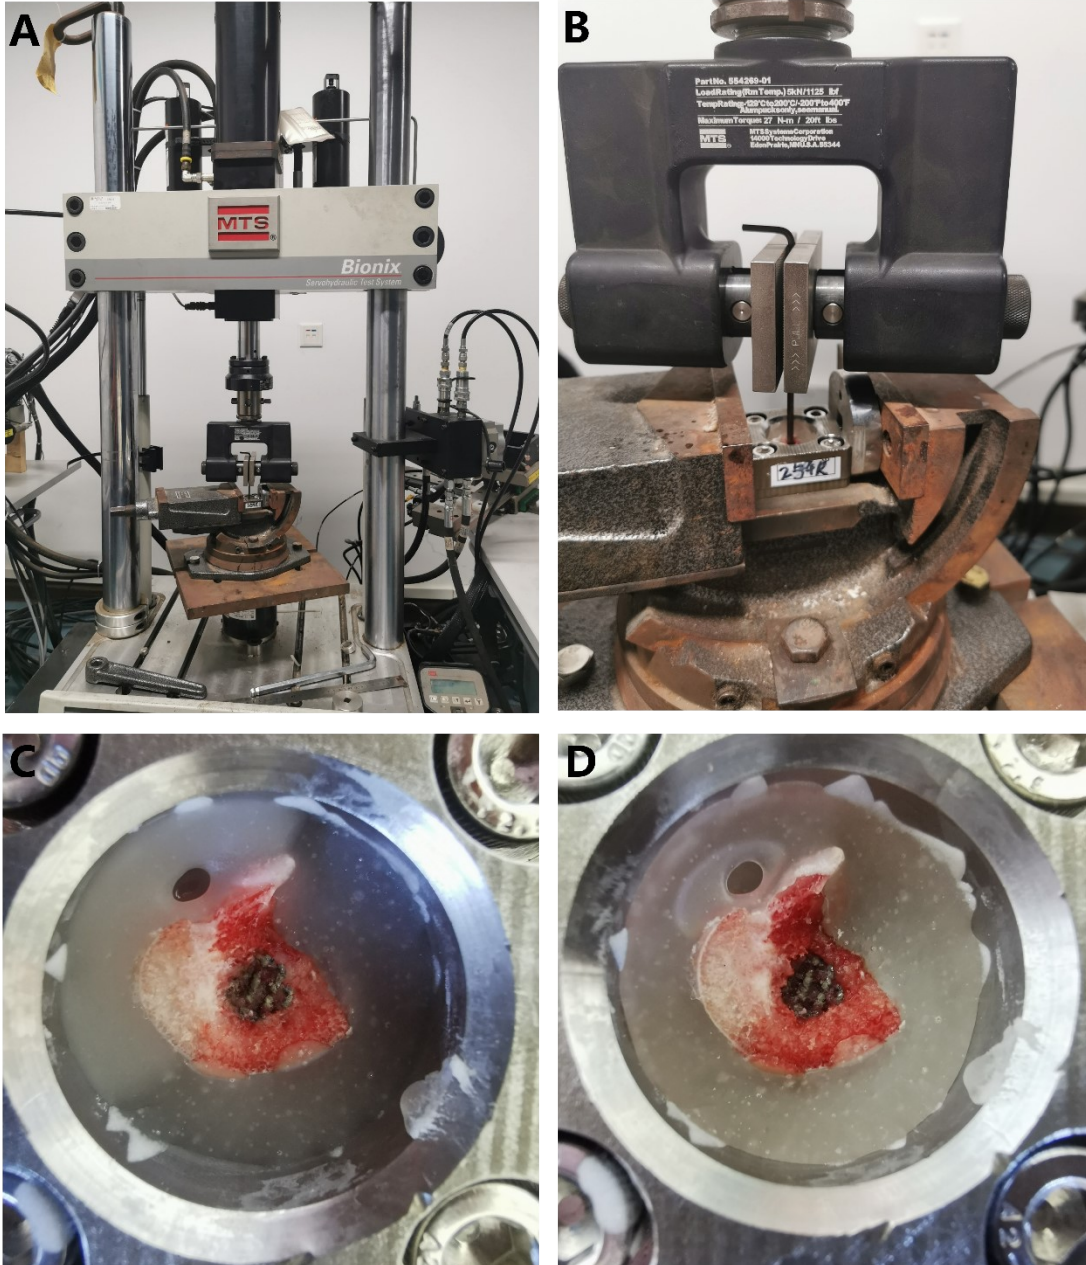

**Supplementary Figure 3. Mechanical testing system of Push-out test**

(A) Image of mechanical testing system (Landmark, MTS Inc., Eden Prairie, MN, USA). (B) Fixed specimen in a special holder using polymethyl methacrylic. (C) Specimen before Push-out test. (D) Specimen after Push-out test. The scaffold was pushed out from the bone.
